# Supplementary material for: EDOT-containing azomethine: an easily prepared electrochromically active material with tuneable colours
Source: Royal Society of Chemistry journal article supplement (doi:10.1039/b923821b), 2010-01-01
Supplement: b923821b.pdf [file b923821b.pdf]

**EDOT-Containing Azomethine – An Easily Prepared  
Electrochromically Active Material with Tuneable Colours**

*Andréanne Bolduc, Stéphane Dufresne, and W. G. Skene\**

Laboratoire de caractérisation photophysiques des matériaux conjugués

Département de Chimie, Pavillon J. A. Bombardier, Université de Montréal, CP 6128, succ.

Centre-ville, Montréal, Québec, CANADA, H3C 3J7.

\* corresponding authors: [w.skene@umontreal.ca](mailto:w.skene@umontreal.ca);

## Table of Contents

|                                                                        |   |
|------------------------------------------------------------------------|---|
| Experimental Section.....                                              | 3 |
| General Procedures.....                                                | 3 |
| Spectroscopic Measurements.....                                        | 3 |
| Electrochemical Measurements.....                                      | 3 |
| Spectroelectrochemical Measurements.....                               | 4 |
| Figure 1. $^1\text{H}$ NMR spectra of 2 in acetone- $\text{d}_6$ ..... | 5 |
| Figure 2. $^{13}\text{C}$ NMR spectra of 3 in DMSO- $\text{d}_6$ ..... | 6 |

## **Experimental Section**

### ***General Procedures***

All reagents were commercially available and were used as received unless otherwise stated. Anhydrous and deaerated solvents were obtained with a solvent purification system.  $^1\text{H}$ -NMR and  $^{13}\text{C}$ -NMR spectra were recorded on a 400 MHz spectrometer with the appropriate deuterated solvents.

### ***Spectroscopic Measurements***

The absorption measurements were done on a spectrometer and the fluorescence studies were performed on a fluorimeter after deaerating the samples thoroughly with nitrogen for 20 minutes.

### ***Electrochemical Measurements***

Cyclic voltammetric measurements were done on a potentiostat system. Compounds were dissolved in anhydrous and deaerated dichloromethane at  $10^{-4}$  M with 0.1 M  $\text{NBu}_4\text{PF}_6$ . A platinum electrode was used as the working electrode with a platinum wire as the auxiliary electrode and an Ag/AgCl electrode as the reference electrode.

### ***Spectroelectrochemical Measurements***

Spectroelectrochemical measurements were done by coupling a potentiostat with a spectrometer using a cuvette designed for this experiment and a platinum mesh electrode as the working electrode. The other parameters are the same as in normal cyclic voltammetry experiments that was described above.

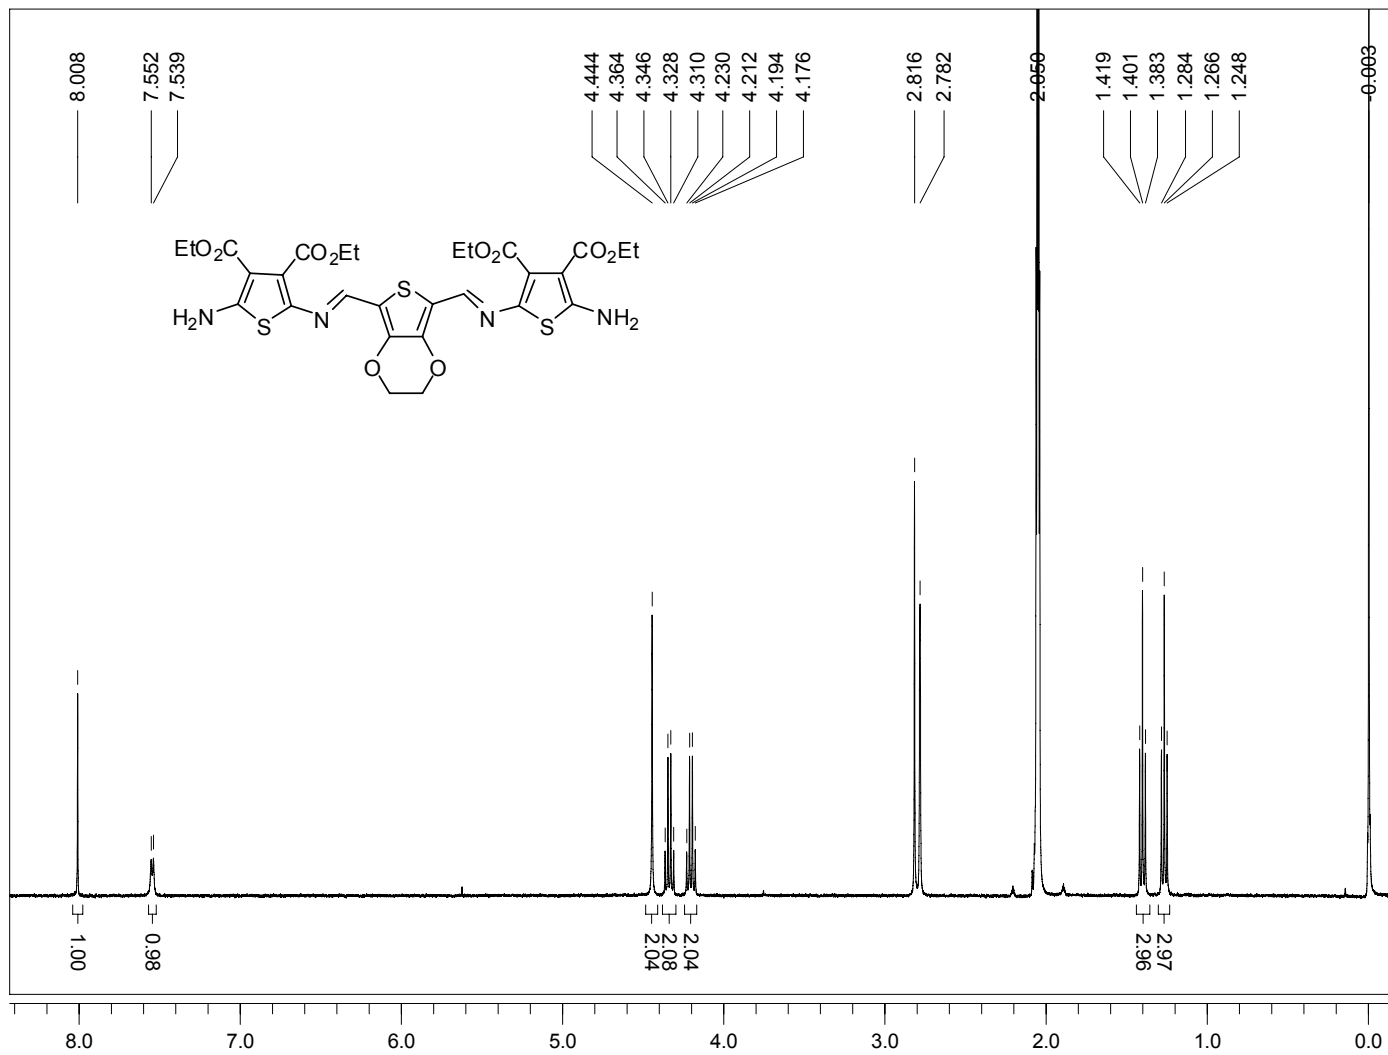

Figure 1.  $^1\text{H}$  NMR spectra of 2 in acetone- $\text{d}_6$ .

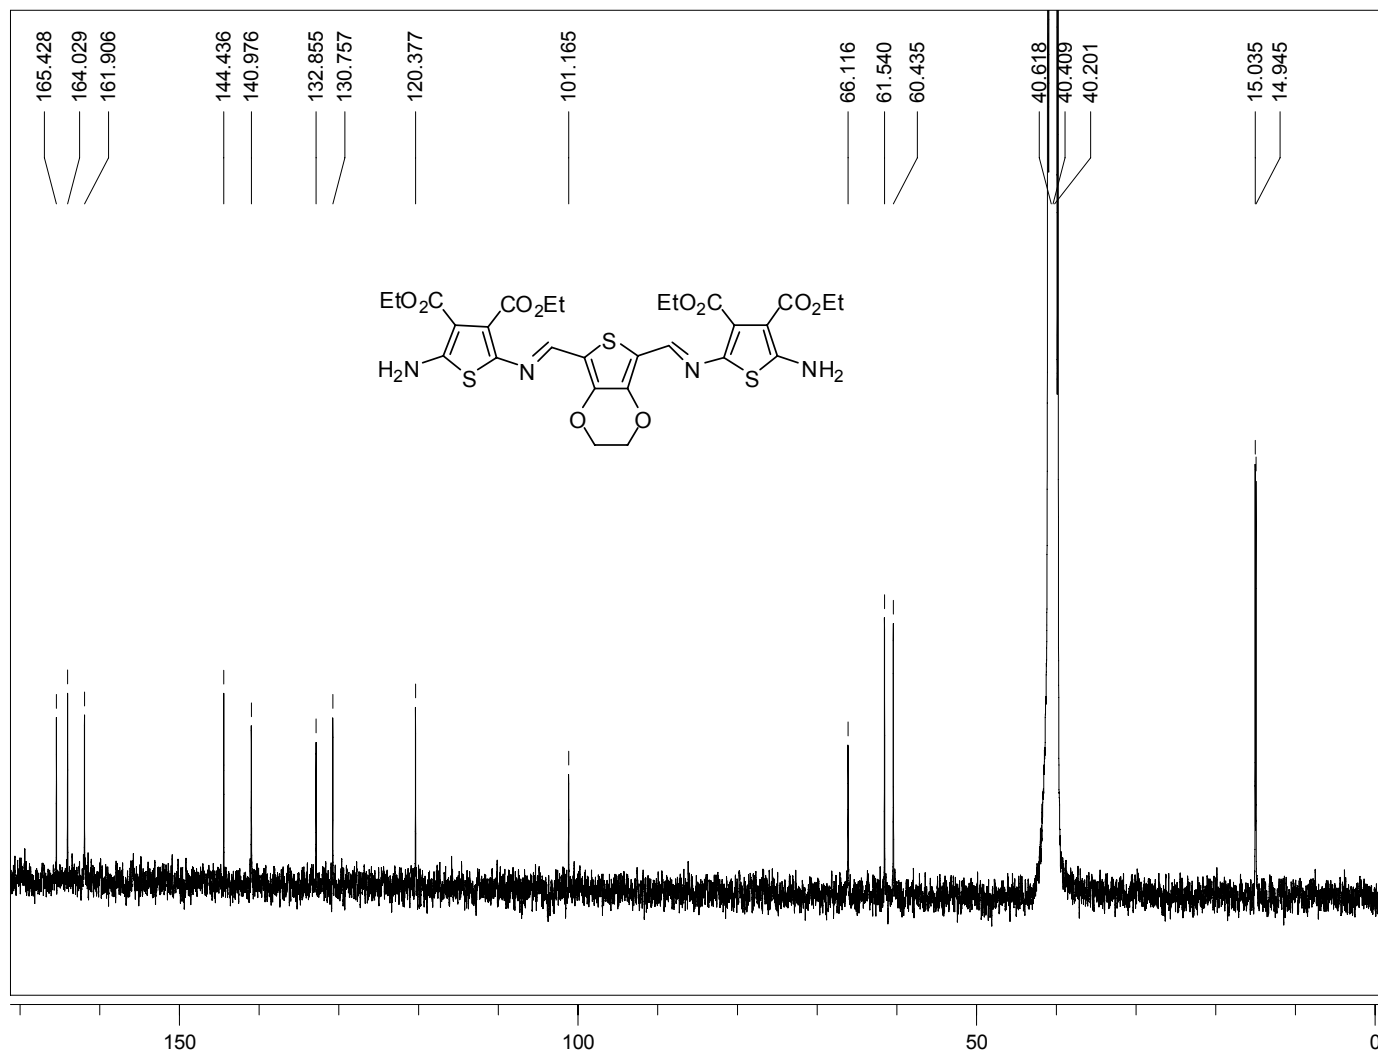

Figure 2.  $^{13}\text{C}$  NMR spectra of **3** in  $\text{DMSO-d}_6$
